# Supplementary material for: Allele-specific silencing of EEC p63 mutant R304W restores p63 transcriptional activity
Source: PubMed Central journal article supplement (PMC4917656; doi:10.1038/cddis.2016.118), 2016-05-19
Supplement: cddis2016118x1.pdf [file cddis2016118x1.pdf]

**a**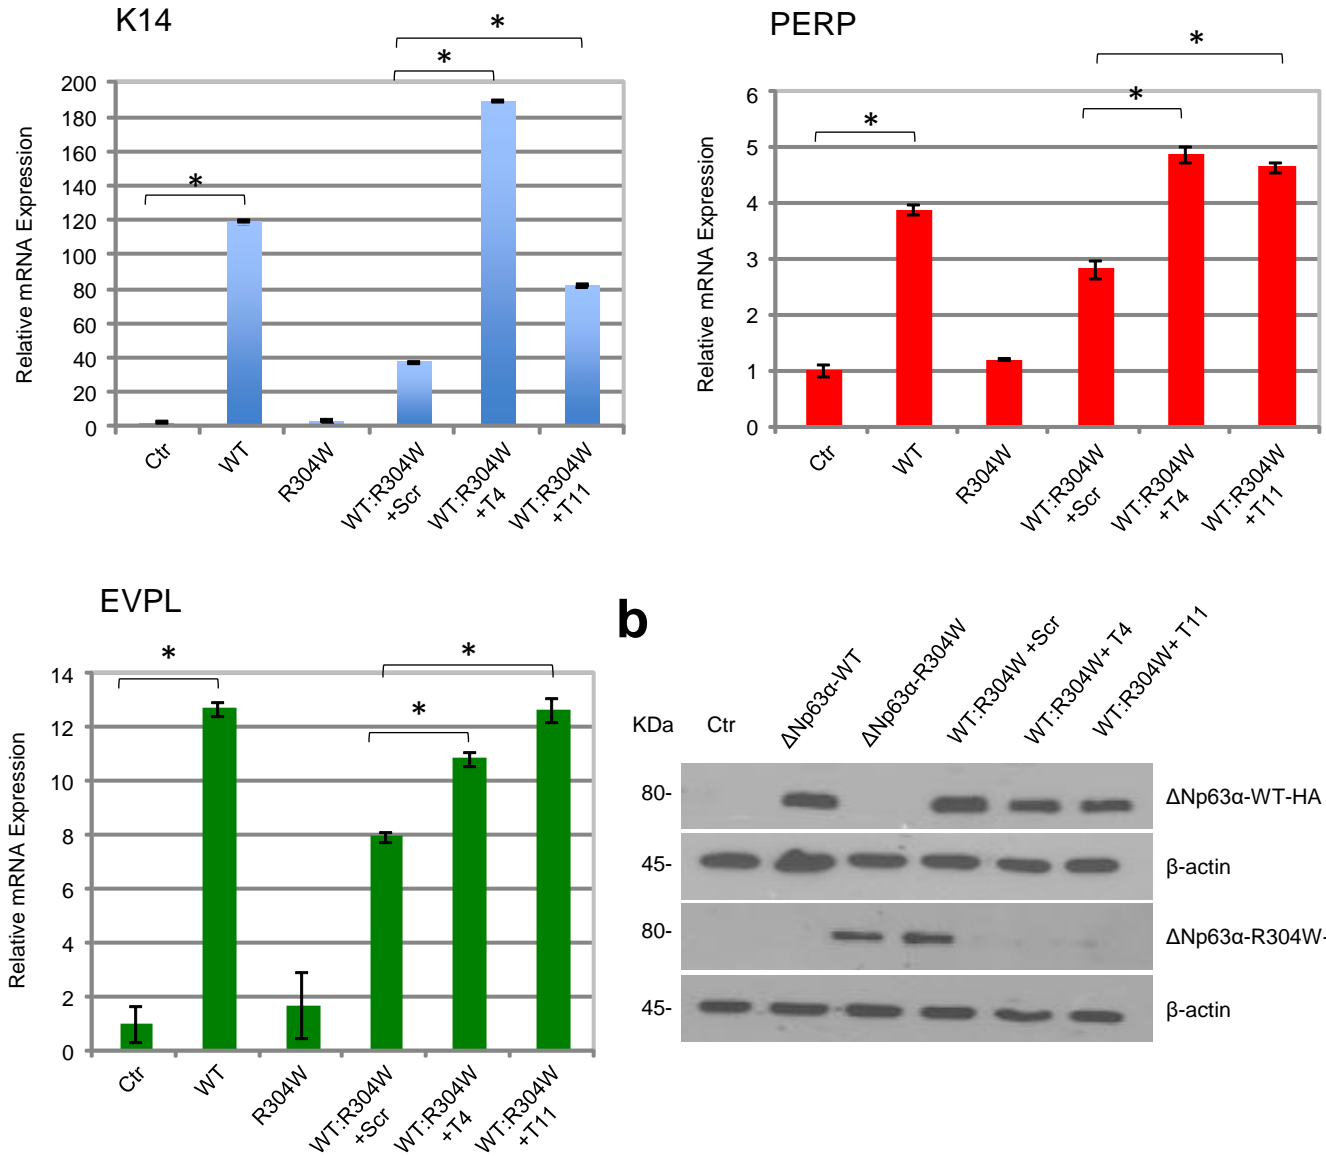**b**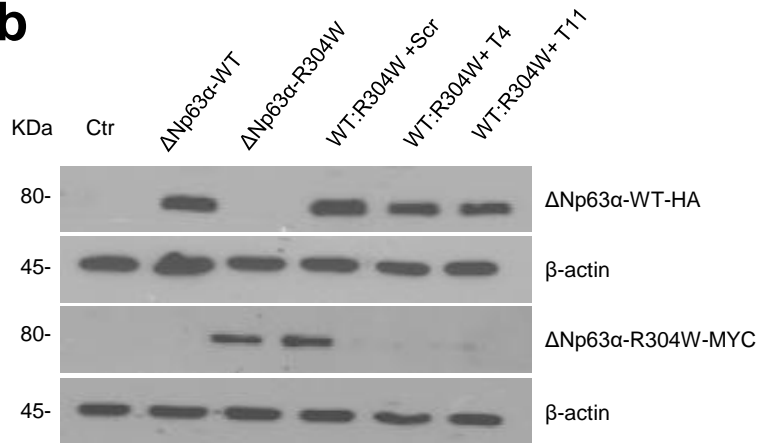**Figure S1 Silencing of the mutant allele restores DNP63-WT transcription activity in Saos-2 cells.**

Saos-2 cells were transfected with DNP63-WT, DNP63-R304W, DNP63-WT:DNP63-R304W (2:1 ratio) in presence of siRNA not specific sequence (Scr), T4 and T11. ΔNp63-WT is HA-tagged; ΔNp63-R304W is Myc-tagged. \*,  $p < 0.05$ . **a**) T4 and T11 partially restore DNP63-WT transcriptional activity, evaluated by real-time PCR of keratin 14 (K14), PERP and EVPL mRNAs. Data are presented as mean  $\pm$  SD of three independent experiments. \*,  $p < 0.05$ . **b**) Western blot demonstrates the T4 and T11 selectivity. One representative experiment of three is shown. b-actin is shown as loading control.
